# Supplementary material
Source: PubMed Central journal article supplement (PMC9309042)
Supplement: jciinsight-7-157354-s193.pdf [file jciinsight-7-157354-s193.pdf]

Supplemental Table 1. NT50 value against each variant for all patients

|                 |      | Vaccinated cohort (30 dyads) |       |       |       |      |      |       |       |       |      | Infected cohort (30 dyads) |       |       |       |      |      |       |       |       |    |
|-----------------|------|------------------------------|-------|-------|-------|------|------|-------|-------|-------|------|----------------------------|-------|-------|-------|------|------|-------|-------|-------|----|
|                 |      | Maternal                     |       |       |       |      | Cord |       |       |       |      | Maternal                   |       |       |       |      | Cord |       |       |       |    |
|                 |      | WT                           | Alpha | Kappa | Delta | Mu   | WT   | Alpha | Kappa | Delta | Mu   | WT                         | Alpha | Kappa | Delta | Mu   | WT   | Alpha | Kappa | Delta | Mu |
| 1 <sup>st</sup> | 127  | 106                          | 81    | 24    | 28    | 125  | 177  | 197   | 50    | 34    | 140  | 137                        | 144   | 80    | 108   | 206  | 171  | 77    | 116   | 42    |    |
|                 | 66   | 15                           | 26    | 15    | 15    | 16   | 19   | 35    | 15    | 128   | 15   | 15                         | 15    | 15    | 15    | 15   | 15   | 15    | 15    | 15    |    |
|                 | 25   | 48                           | 45    | 15    | 48    | 57   | 82   | 69    | 15    | 42    | 114  | 145                        | 135   | 30    | 15    | 85   | 149  | 92    | 21    | 15    |    |
|                 | 104  | 117                          | 15    | 15    | 59    | 124  | 253  | 51    | 15    | 15    | 45   | 107                        | 87    | 15    | 173   | 115  | 187  | 60    | 44    | 49    |    |
|                 | 15   | 65                           | 15    | 15    | 15    | 15   | 15   | 26    | N/A   | N/A   | 88   | 121                        | 78    | N/A   | 46    | 178  | 299  | 93    | N/A   | N/A   |    |
| 2 <sup>nd</sup> | 55   | 39                           | 15    | 55    | 15    | 44   | 59   | 15    | 93    | 15    | 30   | 31                         | 15    | 15    | 96    | 15   | 37   | 34    | 15    | 346   |    |
|                 | 121  | 108                          | 149   | 93    | 15    | 497  | 152  | 482   | 725   | 100   | 265  | 210                        | 215   | 1192  | 65    | 1111 | 214  | 1122  | 2846  | 18    |    |
|                 | 279  | 477                          | 163   | 127   | 15    | 145  | 379  | 61    | 106   | 15    | 33   | 63                         | 15    | 31    | 15    | 27   | 15   | 15    | 42    | 15    |    |
|                 | 68   | 108                          | 156   | 123   | 41    | 215  | 194  | 183   | 107   | 82    | 165  | 297                        | 147   | 79    | 37    | 154  | 241  | 364   | 51    | 103   |    |
|                 | 322  | 385                          | 66    | 46    | 40    | 257  | 374  | 87    | 98    | 52    | 133  | 88                         | 77    | 57    | 63    | 75   | 148  | 42    | 23    | 25    |    |
|                 | 15   | 30                           | 40    | 15    | 15    | 18   | 40   | 43    | 15    | 65    | 551  | 1383                       | 318   | 1165  | 21    | 825  | 1839 | 250   | 425   | 15    |    |
|                 | 206  | 275                          | 110   | 89    | 219   | 1850 | 1850 | 217   | 207   | 269   | 838  | 838                        | 188   | 327   | 112   | 332  | 332  | 313   | 154   | N/A   |    |
|                 | 638  | 674                          | 294   | 139   | 205   | 877  | 644  | 366   | 167   | 640   | 479  | 640                        | 526   | 98    | 106   | 826  | 1544 | 892   | 154   | 188   |    |
|                 | 159  | 152                          | 128   | 108   | 19    | 138  | 251  | 106   | 50    | 20    | 132  | 108                        | 102   | 22    | 175   | 291  | 163  | 88    | 48    | 38    |    |
|                 | 339  | 818                          | 86    | 19    | 52    | 485  | 1100 | 131   | 78    | 287   | 136  | 325                        | 125   | 15    | 15    | 215  | 428  | 110   | 15    | 15    |    |
|                 | 71   | 28                           | 256   | 111   | 106   | 194  | 139  | 81    | 489   | 250   | 170  | 142                        | 267   | 55    | 100   | 105  | 87   | 138   | 15    | N/A   |    |
|                 | 643  | 380                          | 200   | 110   | 47    | 1746 | 1145 | 795   | 261   | 213   | 121  | 228                        | 142   | 38    | 69    | 185  | 272  | 306   | 59    | 46    |    |
| 3 <sup>rd</sup> | 328  | 151                          | 175   | 162   | 165   | 271  | 220  | 467   | 968   | 83    | 494  | 212                        | 217   | 262   | 204   | 107  | 249  | 160   | 114   | 202   |    |
|                 | 300  | 180                          | 92    | 87    | 77    | 212  | 62   | 104   | 17    | 39    | 1275 | 982                        | 1093  | 2532  | 359   | 1281 | 1367 | 736   | 663   | 64    |    |
|                 | 144  | 57                           | 62    | 41    | 71    | 439  | 139  | 160   | 315   | 136   | 304  | 152                        | 80    | 680   | 47    | 203  | 95   | 79    | 262   | 200   |    |
|                 | 733  | 1116                         | 285   | 463   | 148   | 453  | 1025 | 188   | 530   | 106   | 86   | 186                        | 75    | 53    | 15    | 51   | 102  | 45    | 16    | 15    |    |
|                 | 121  | 78                           | 247   | 44    | 15    | 132  | 153  | 118   | 219   | 15    | 43   | 234                        | 177   | 57    | 15    | 29   | 431  | 598   | 15    | 15    |    |
|                 | 369  | 471                          | 260   | 79    | 268   | 342  | 467  | 221   | 102   | 67    | 199  | 104                        | 136   | 75    | N/A   | 85   | 155  | 147   | 33    | 846   |    |
|                 | 474  | 209                          | 751   | 156   | 19    | 639  | 298  | 503   | 246   | 230   | 290  | 255                        | 427   | 154   | 182   | 19   | 22   | 32    | 31    | 104   |    |
|                 | 266  | 282                          | 161   | 94    | 217   | 428  | 471  | 269   | 307   | 98    | 591  | 1629                       | 492   | 174   | 234   | 414  | 1337 | 388   | 171   | 405   |    |
|                 | 1229 | 1819                         | 910   | 621   | 547   | 1071 | 824  | 568   | 550   | 219   | 466  | 183                        | 481   | N/A   | 45    | 245  | 311  | 163   | N/A   | N/A   |    |
|                 | 926  | 2281                         | 536   | 275   | 147   | 574  | 425  | 242   | 161   | 148   | 76   | 152                        | 30    | 15    | 21    | 26   | 61   | 40    | 22    | 175   |    |
|                 | 1431 | 1203                         | 471   | 348   | 240   | 682  | 399  | 390   | 324   | 258   | 148  | 80                         | 96    | 135   | 15    | 97   | 110  | 60    | 20    | 17    |    |
|                 | 1820 | 4419                         | 527   | 892   | 104   | 1584 | 5749 | 690   | 1340  | 211   | 110  | 128                        | 61    | 32    | 29    | 87   | 166  | 19    | 15    | 16    |    |
| 4416            | 1026 | 859                          | 907   | 425   | 2646  | 1488 | 585  | 1530  | 196   | 118   | 82   | 39                         | 1342  | N/A   | 169   | 119  | 36   | N/A   | 128   |       |    |

NT50, neutralizing titer-50; WT, wild type; N/A, not available.

1<sup>st</sup>, 2<sup>nd</sup> and 3<sup>rd</sup> refer to trimesters.

### Supplemental Figure 1

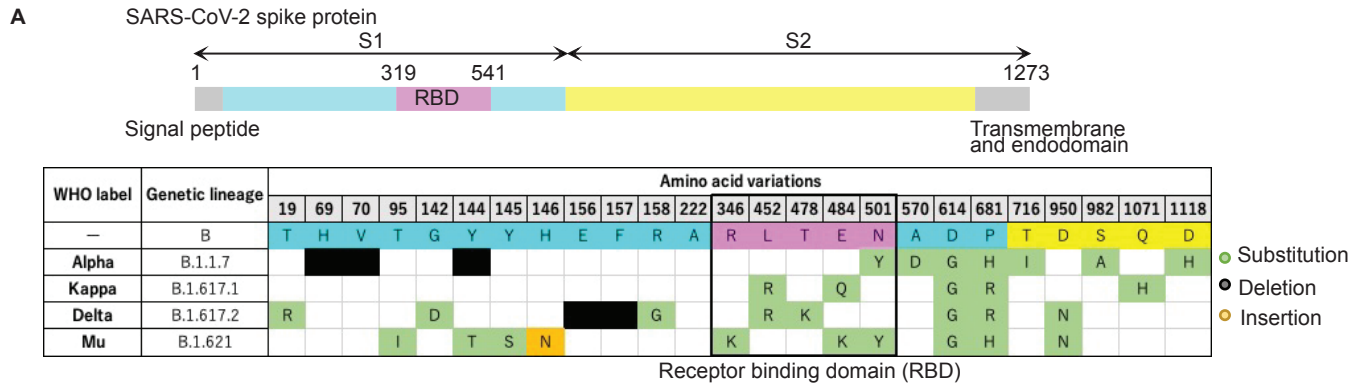

Positions of amino acid substitutions in the spike RBD

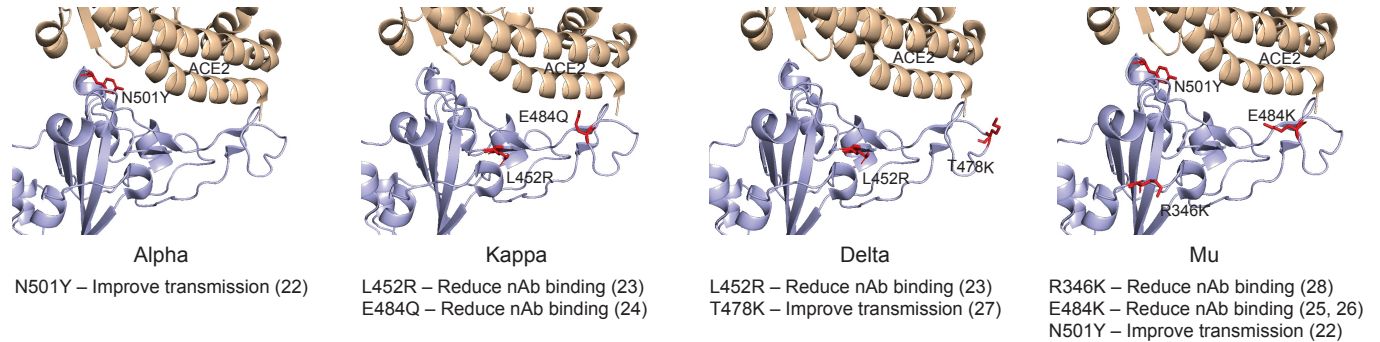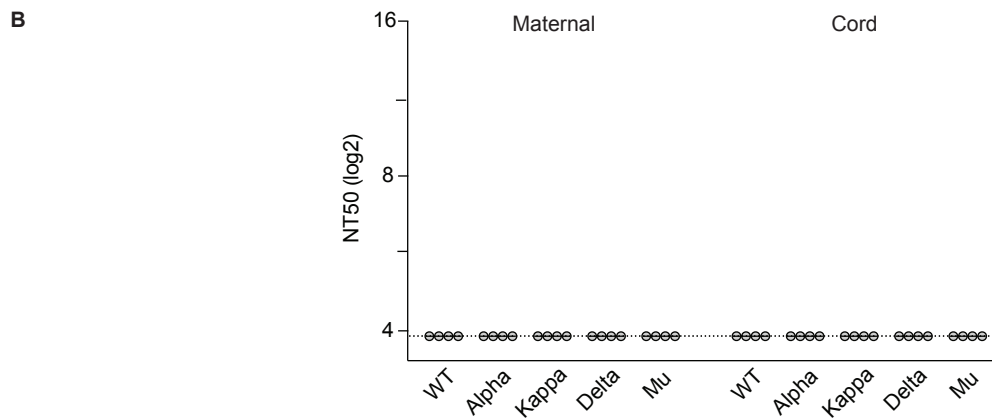

**Supplemental Figure 1. (A)** Positions of mutated amino acid residues in the Spike proteins from four variants. The residues L452R, T478K, R346K, E484K, and N501Y are labeled in red. The crystal structure of SARS-CoV-2 spike RBD and ACE2 (PDB: 6M0J) (1) was used as the template. All structure figures were generated with PyMol (2). **(B)** NT50 values for four dyads who were neither vaccinated nor infected and delivered in the same period were included as negative controls. The dotted line indicates the cut-off threshold of this assay.

## Supplemental Figure 2

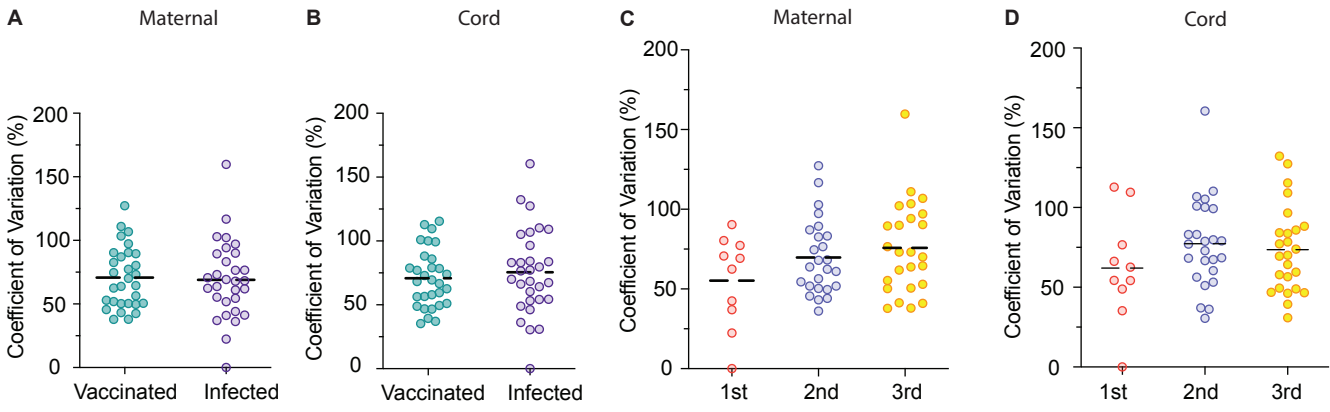

**Supplemental Figure 2.** Maternal blood (A) and cord blood (B) coefficient of variation (CV) values were compared between vaccinated and infected cohorts by multiple linear regression. Maternal blood (C) and cord blood (D) CV values were compared by trimesters. Dashed black bars represent the mean of CV values.

Supplemental Figure 3

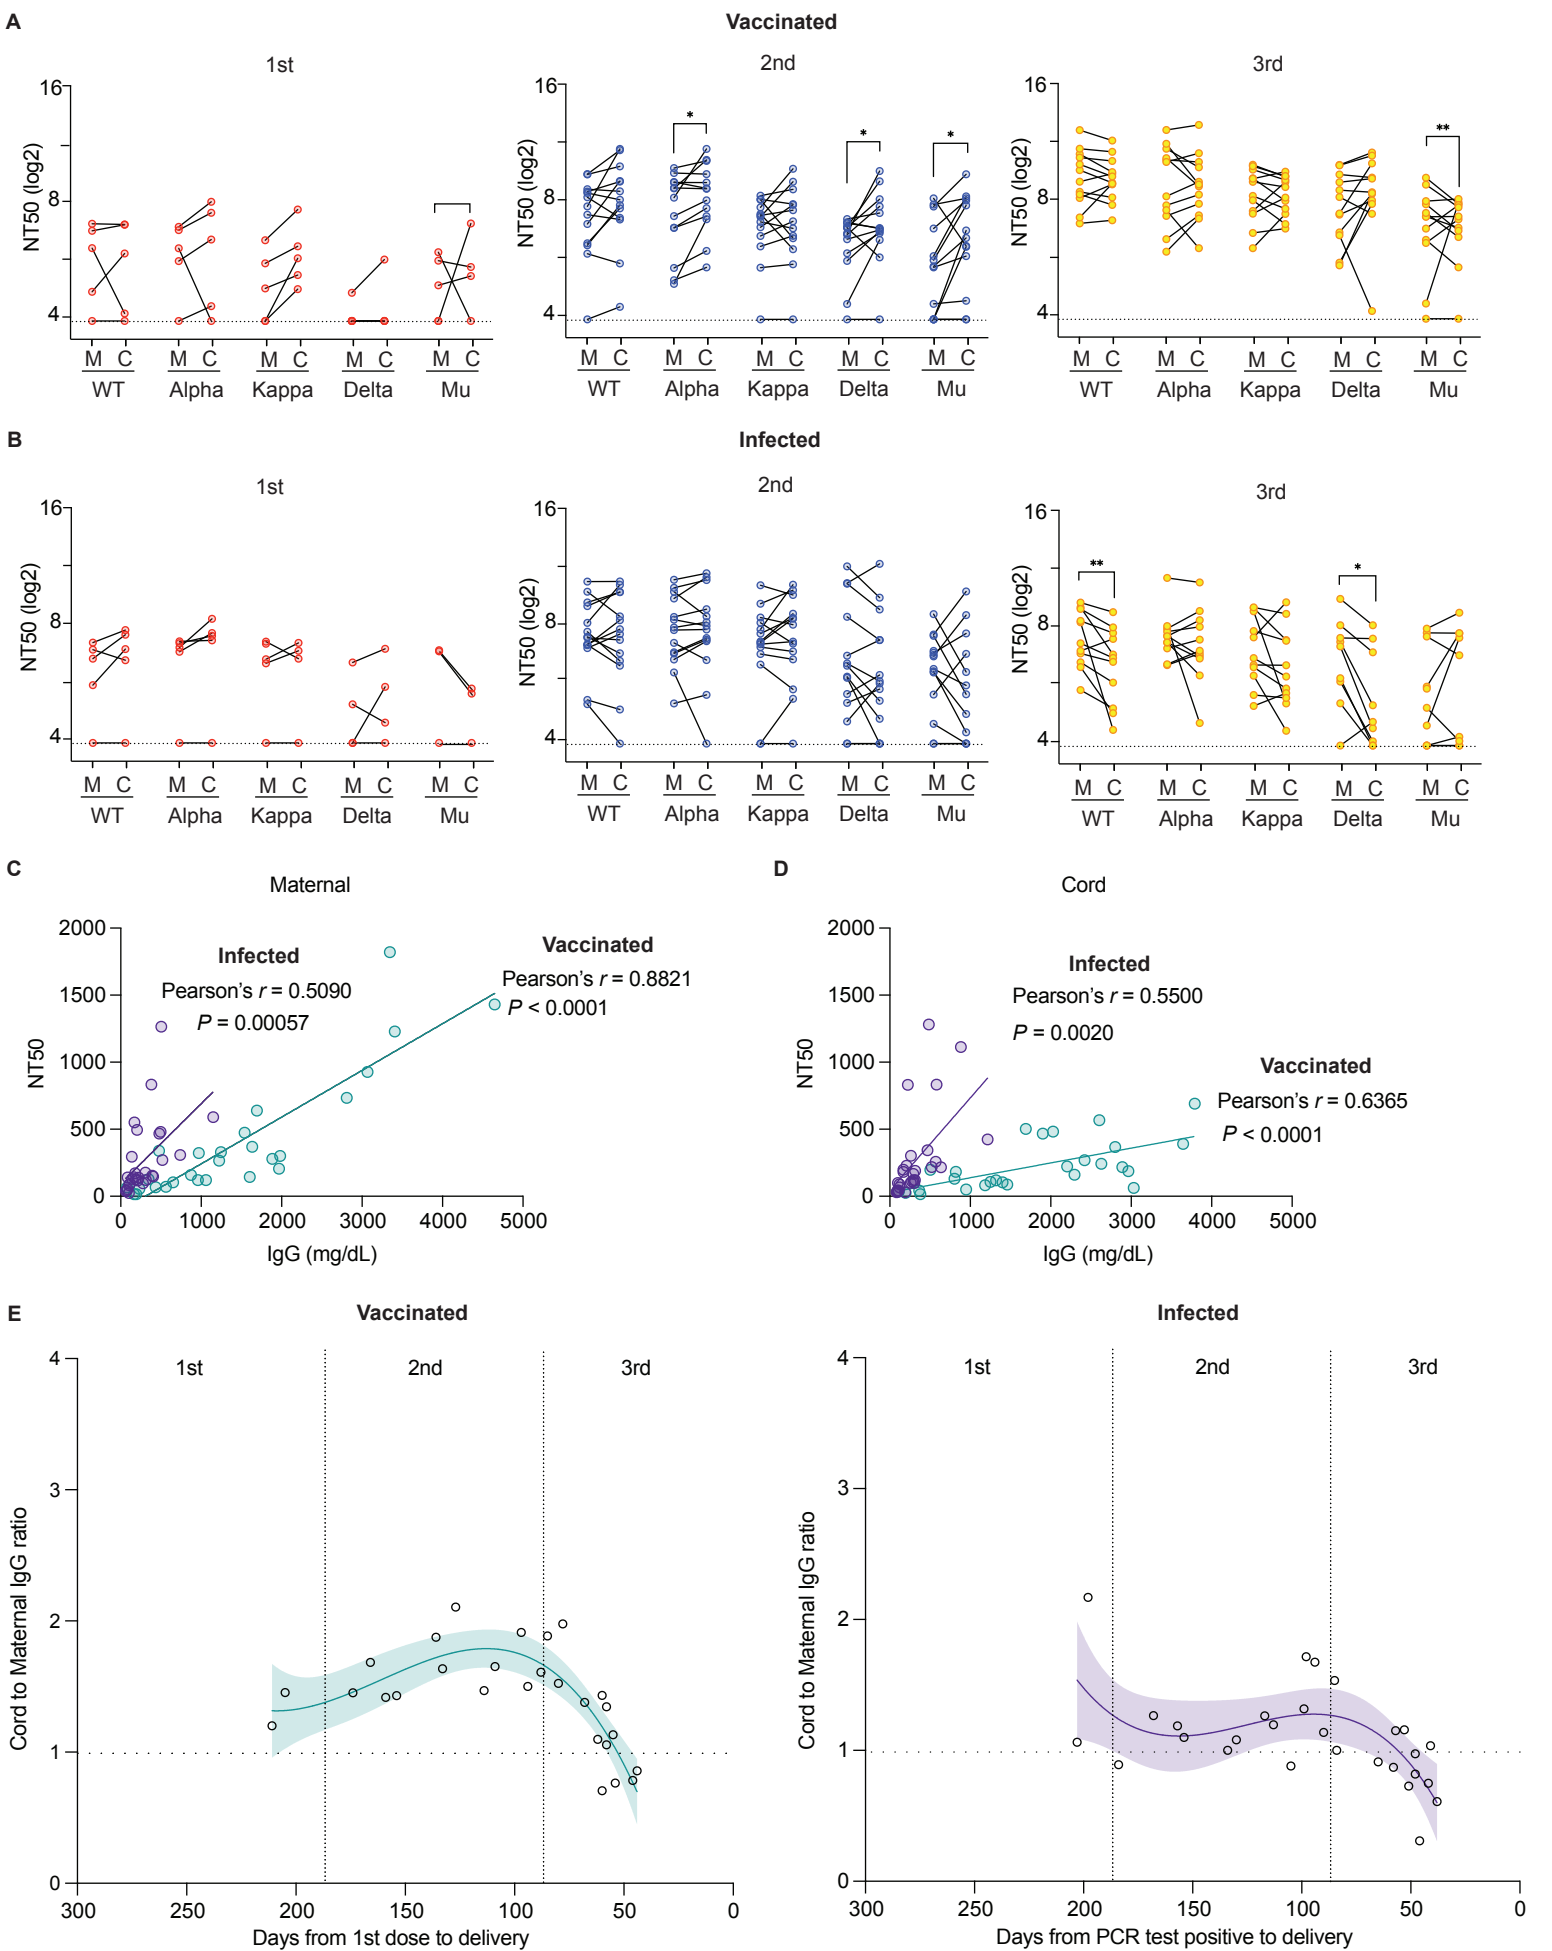

**Supplemental Figure 3.** (A, B) Comparison of neutralizing antibody transfer by trimester and by five strains. Dot plots represent NT50 values of nAb against each variant in maternal or cord plasma. (C, D) Correlation between NT50 values and the IgG values were calculated with Pearson correlation coefficient in maternal (C) and cord (D) plasma samples. (E) Cord to maternal IgG antibody transfer ratios were plotted using IgG values tested by the Pylon 3D automated immunoassay system in order of the timing on the first vaccine dose (left) or the first positive PCR result (right). \* $P < 0.05$ ; \*\* $P < 0.01$  (Wilcoxon signed rank test).

### Supplemental Figure 4

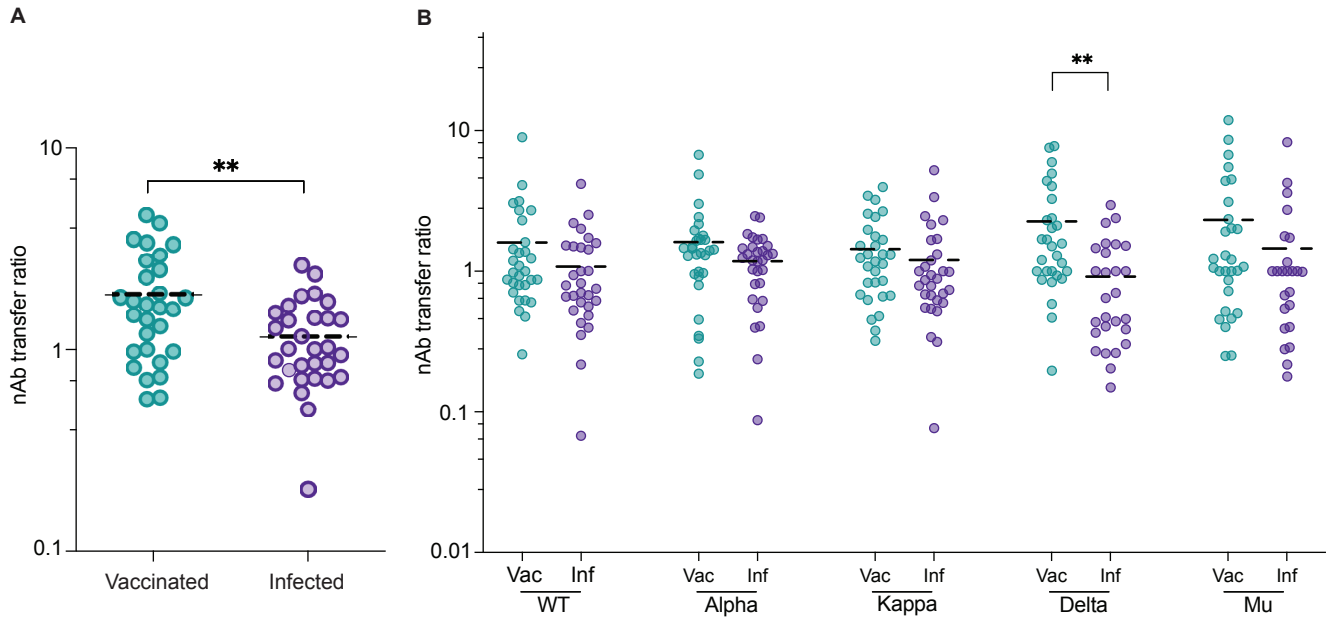

**Supplemental Figure 4.** (A) Transfer ratios (TRs) for all five strains were compared between vaccinated and infected cohorts. (B) TRs were stratified by SARS-CoV-2 strains and compared between vaccinated and infected cohorts. Dashed black bars represent the mean of TR values. Vac, vaccinated cohort; Inf, infected cohort. \*\*P < 0.01 (Pearson's rank test).

**Supplemental Figure 5**

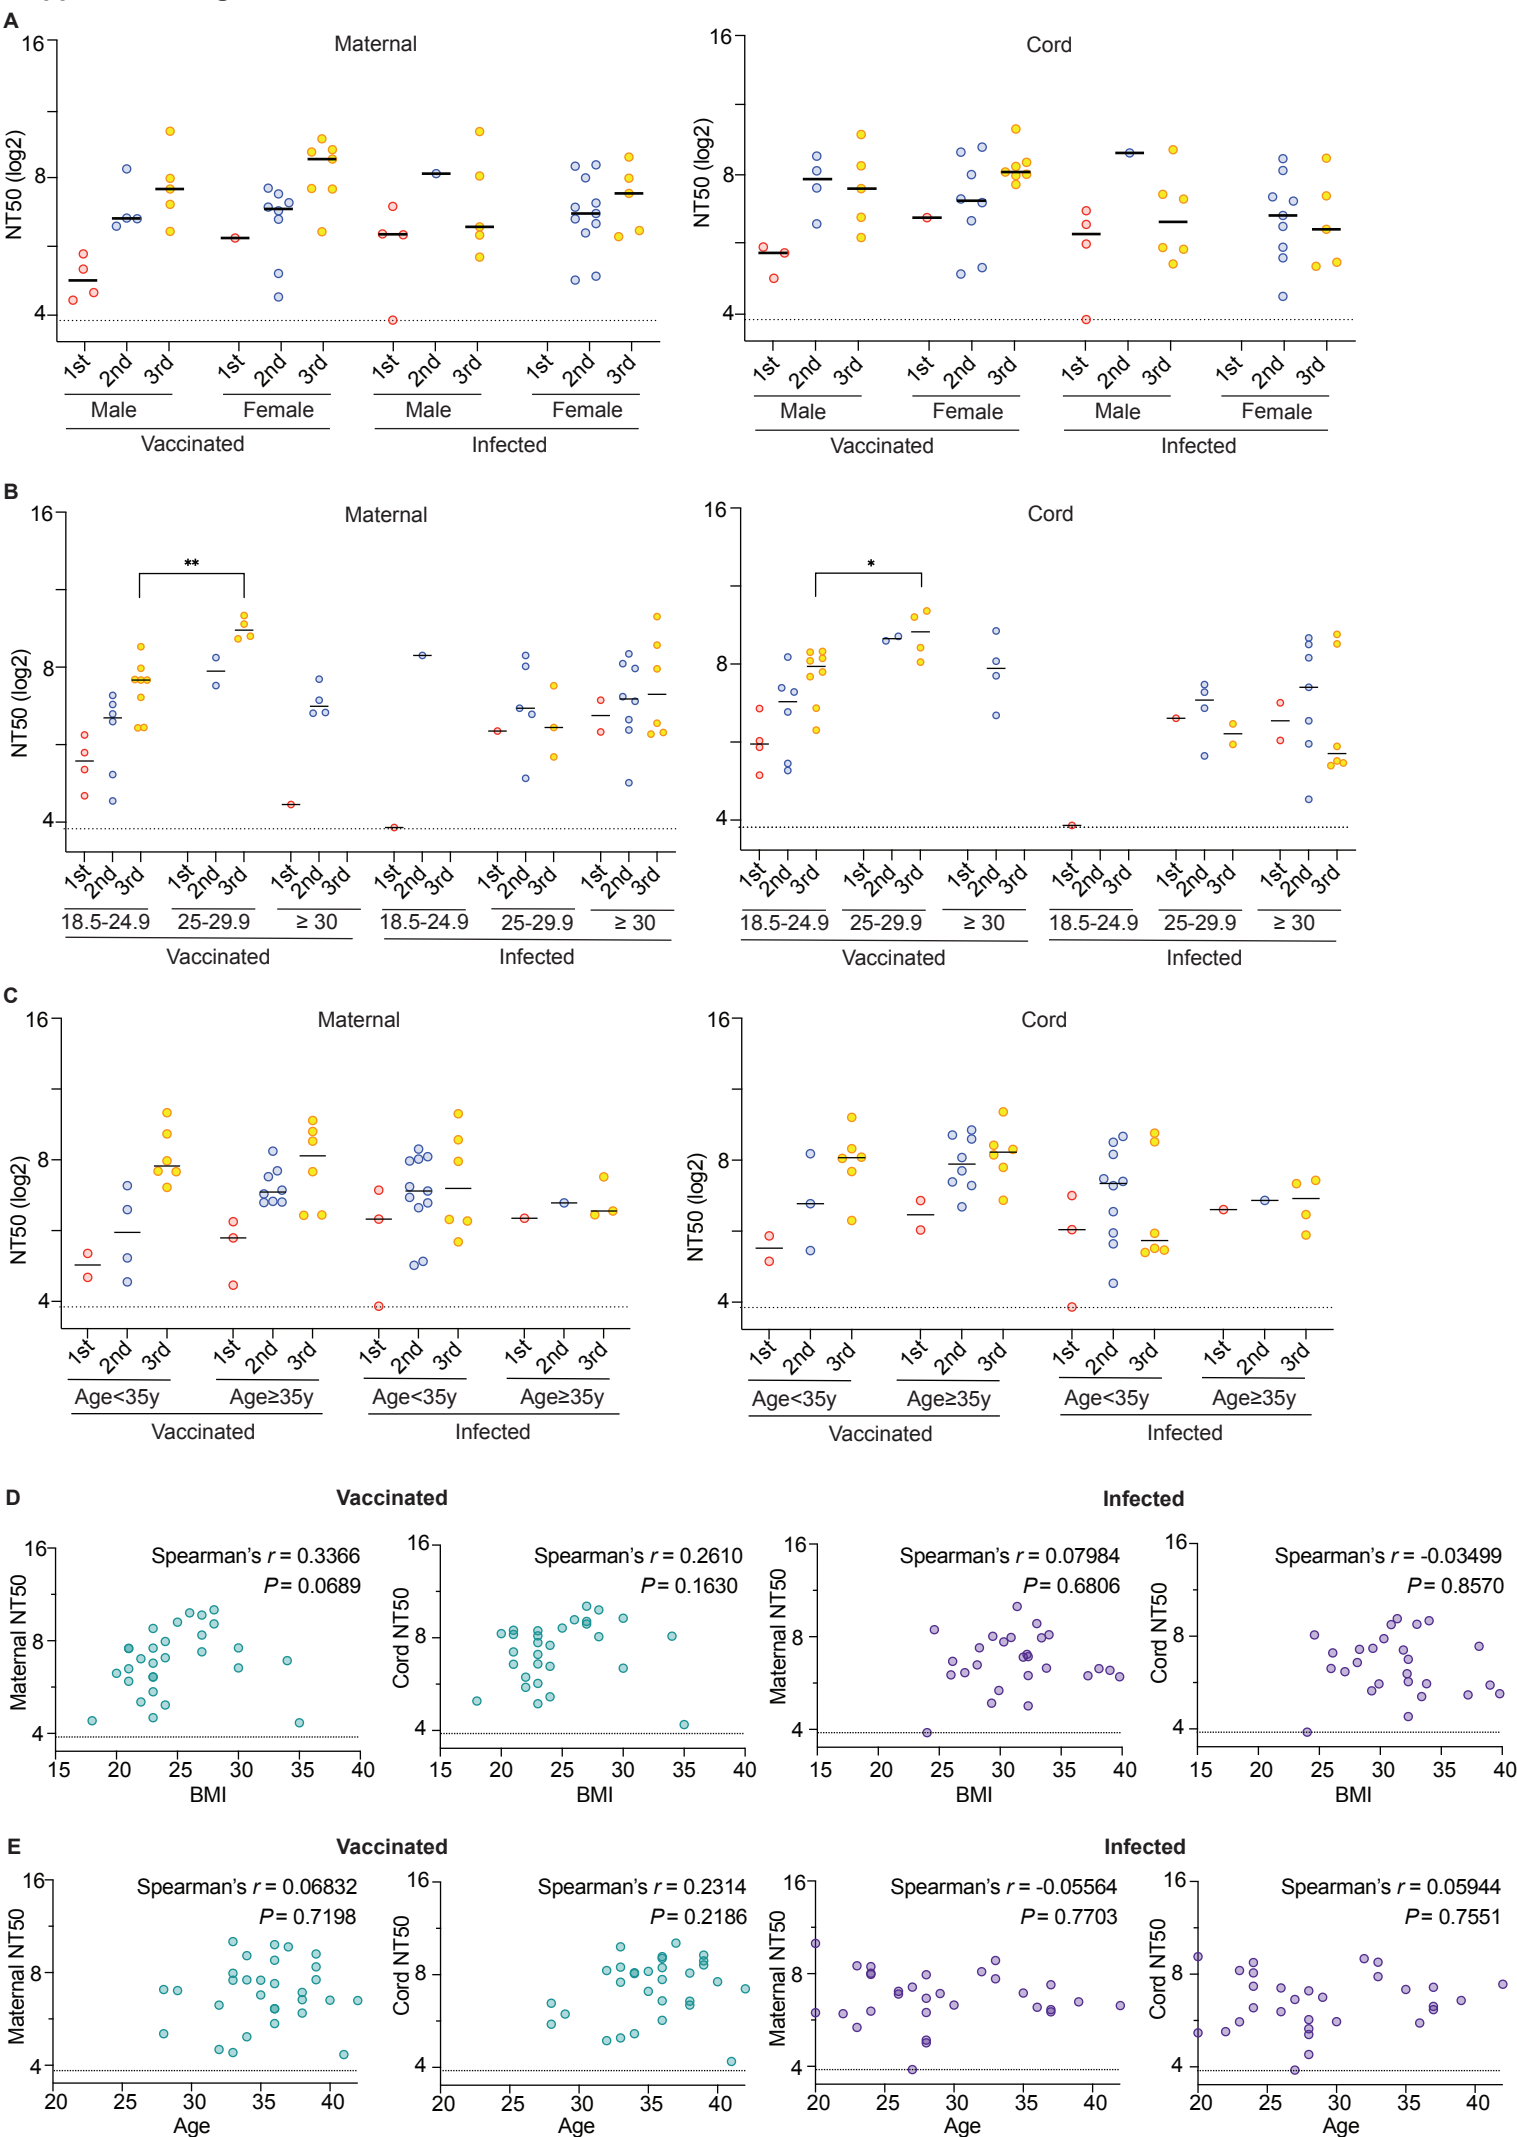

**Supplemental Figure 5. Neutralizing activity and clinical factors.** Maternal and cord NT50 values were compared in vaccinated versus infected mothers, stratified by trimester of exposure and by (A) Fetal sex, (B) Maternal Body Mass Index (BMI) and (C) Maternal age. The BMI at the time of delivery was divided into three groups: 18.5 to 24.9, 25 to 29.9, and 30 or more and compared. Maternal age was divided into two groups: older than 35 years and younger than 35 years. Dot plots represent mean NT50 against variants. Black lines indicate median. Trimester of exposure is indicated by color (Red, first trimester; blue, second trimester; yellow, third trimester). \*\*P < 0.01; (Mann-Whitney test or Friedman's test with Dunn's multiple comparisons). (D, E) Correlations between NT50 values and maternal BMI (D) and maternal age (E) were calculated with Spearman's rank correlation in maternal and cord plasma from vaccinated or infected groups, separately.
